## 1 **The food web of Potter Cove (Antarctica): complexity, structure and function**

2 Tomás I. Marina <sup>1,2,3</sup>, Vanesa Salinas <sup>1,2</sup>, Georgina Cordone <sup>1,2</sup>, Gabriela Campana <sup>3,4</sup>, María  
3 Eugenia Moreira <sup>4</sup>, Dolores Deregibus <sup>4</sup>, Luciana Torre <sup>5,6</sup>, Ricardo Sahade <sup>5,6</sup>, Marcos Tatián <sup>5</sup>,  
4 <sup>6</sup>, Esteban Barrera Oro <sup>1,4,9</sup>, Marleen De Troch <sup>7</sup>, Santiago Doyle <sup>2</sup>, María Liliana Quartino <sup>8,9</sup>,  
5 Leonardo A. Saravia <sup>2</sup>, Fernando R. Momo <sup>2,3</sup>

6 <sup>1</sup> Consejo Nacional de Investigaciones Científicas y Técnicas (CONICET)

7 <sup>2</sup> Instituto de Ciencias Universidad Nacional de General Sarmiento, J.M. Gutierrez 1150 (1613),  
8 Los Polvorines, Argentina

9 <sup>3</sup> INEDES, Universidad Nacional de Luján, CC 221, 6700 Luján, Argentina

10 <sup>4</sup> Instituto Antártico Argentino, Cerrito 1248 (C1010AAZ), Ciudad Autónoma de Buenos Aires,  
11 Argentina

12 <sup>5</sup> Facultad de Ciencias Exactas, Físicas y Naturales, Universidad Nacional de Córdoba, Av.  
13 Vélez Sarsfield 299 (5000), Córdoba, Argentina

14 <sup>6</sup> Instituto de Diversidad y Ecología Animal (Consejo Nacional de Investigaciones Científicas y  
15 Técnicas)

16 <sup>7</sup> Marine Biology, Ghent University, Krijgslaan 281/S8, (B-9000), Ghent, Belgium

17 <sup>8</sup> Dirección Nacional del Antártico, Instituto Antártico Argentino, Departamento de Biología  
18 Costera, 25 de mayo 1143, San Martín (CP 1650), Buenos Aires, Argentina

19 <sup>9</sup> Museo Argentino de Ciencias Naturales B. Rivadavia. Av. A. Gallardo 470 (C1405DJR),  
20 Buenos Aires, Argentina

21 E-mail: [tomasimarina@gmail.com](mailto:tomasimarina@gmail.com)

## 22 **Abstract**

23 Knowledge of the food web structure and complexity are central to better understand ecosystem  
24 functioning. A food-web approach includes both species and energy flows among them,  
25 providing a natural framework for characterizing species' ecological roles and the mechanisms  
26 through which biodiversity influences ecosystem dynamics. Here we present for the first time a  
27 high-resolution food web for a marine ecosystem at Potter Cove (northern Antarctic Peninsula).  
28 Eleven food web properties were analyzed in order to document network complexity, structure  
29 and topology. We found a low linkage density (3.4), connectance (0.04) and omnivory  
30 percentage (45), as well as a short path length (1.8) and a low clustering coefficient (0.08).  
31 Furthermore, relating the structure of the food web to its dynamics, an exponential degree  
32 distribution (in- and out-links) was found. This suggests that the Potter Cove food web may be  
33 vulnerable if the most connected species became locally extinct. For two of the three more  
34 connected functional groups, competition overlap graphs imply high trophic interaction between  
35 demersal fish and niche specialization according to feeding strategies in amphipods. On the other  
36 hand, the prey overlap graph shows also that multiple energy pathways of carbon flux exist  
37 across benthic and pelagic habitats in the Potter Cove ecosystem. Although alternative food  
38 sources might add robustness to the web, network properties (low linkage density, connectance  
39 and omnivory) suggest fragility and potential trophic cascade effects.

40 **Key words:** Ecological networks; Structure; Degree distribution; Marine ecosystem;  
41 Antarctica.

42

## 43 **1. Introduction**

44 Food web (FW) characterization is essential to understanding ecology as a way to describe and  
45 quantify the complexity of ecosystems by identifying the trophic interactions among species  
46 (Bascompte 2009). The framework of ecological network analysis could also be used to quantify  
47 the effects of the environment and how indirect effects of such interactions influence overall  
48 ecosystem properties (Brose and Dunne 2009).

49 Since the early 2000s, ecological networks from marine systems have received more attention  
50 answering an emphatical call of Raffaelli (2000) for more research on marine webs. In this sense,  
51 indices derived from Ecological Network Analysis (ENA), a system-oriented methodology to  
52 analyze within system interactions (Fath et al. 2007), have been used to investigate trophic  
53 interactions in marine ecosystems (Baird et al. 2007, Ulanowicz 2011, Wuff et al. 2012,  
54 Heymans et al. 2014). Among marine webs, polar FWs recently began to be considered in the  
55 frame of FW theory (e.g. Jacob et al. 2006, Bodini et al. 2009, de Santana et al. 2013). Moreover,  
56 some conclusions on the effects of global warming on Arctic and Antarctic marine FWs have  
57 been proposed (de Santana et al. 2013, Kortsch et al. 2015).

58 Potter Cove is an Antarctic fjord that suffers from the impact of the high rate of warming  
59 occurring in Western Antarctic Peninsula (Quartino et al. 2013, Deregibus et al. 2016). The  
60 abundant and rich epibenthic fauna has been changing under the influence of considerable  
61 sediment inputs and other effects derived from ice melting (Pasotti et al. 2015a, Sahade et al.  
62 2015). The way in which network properties can be modified under climate change is in general,  
63 poorly known (Petchey et al. 2010, Walther 2010, Woodward et al. 2010). To understand the  
64 community-level consequences of the rapid polar warming, Wirta et al. (2015) suggested that we  
65 should turn from analyses of populations, population pairs, and isolated predator–prey couplings

66 to considering all the species interacting within communities. If species affected by perturbations  
67 possess key functional roles in the FW, then the potential higher order, indirect effects of those  
68 perturbations on the entire FW structure can be dramatic (Kortsch et al. 2015). Knowing that  
69 climate change effects are already occurring in Potter Cove ecosystem and that ecosystems  
70 respond to perturbations as a whole, a network approach could contribute to a better  
71 understanding of changes in the ecosystem's synthetic properties like resilience or stability. A  
72 representative roadmap of trophic interactions of Potter Cove will allow testing for the impact of  
73 ongoing climate change effects (e.g. glacier retreat, loss of ice shelves, increment of  
74 sedimentation input) which might be transmitted throughout the entire ecosystem.  
75 Although FW studies use binary webs that indicate the presence of a trophic interaction but do  
76 not provide any information on the frequency of the interaction or the rate of biomass flow  
77 through the interaction, overlap graphs (e.g. competition and common-enemy graphs), can  
78 provide information about indirect interaction strength between predators and prey, respectively.  
79 Indirect effects in predator and prey assemblages can also be studied by evaluating these graphs.  
80 The strength of predator-predator and prey-prey indirect interactions is extremely difficult to  
81 measure but, if they prove generally prevalent, they could be a major driver of community  
82 dynamics and ecosystem functioning (Woodward et al. 2005). The analysis of the degree  
83 distribution of links in the overlap graphs, omitted in most FW studies, might be very useful to  
84 identify, based on the competition graph, generalist and specialist predators, and to evaluate  
85 energy pathways in the common-enemy graph.  
86 In the current work, we present the first, detailed analysis of the FW for the Potter Cove  
87 ecosystem (South Shetland Islands, Antarctica). The objectives of this study were to: 1) analyze  
88 the complexity and structure of the ecological network in the context of the most-studied marine

89 FWs; and 2) examine its degree distribution and overlap graphs in order to gain insight into the  
90 ecosystem dynamics and functioning.

## 91 **2. Methods**

92 Potter Cove is a 4 km long and 2.5 km wide Antarctic fjord located at 25 de Mayo/King George  
93 Island (62°14'S, 58°40'W, South Shetland Islands) (Fig. 1). A shallow sill (< 30 m) separates its  
94 inner and outer areas. The inner cove is characterized by soft sediments and by a shallower depth  
95 than the outer cove (< 50 m); in the outer cove the bottom is mainly rocky and with average  
96 depths of 100 m. Potter Cove is adjacent to Maxwell Bay, which connects to the Bransfield  
97 Strait. Water circulation in Potter Cove is strongly influenced by the general circulation of  
98 Maxwell Bay (Roese and Drabble 1998). A cyclonic circulation has been identified, with  
99 efficient water renewal in the northern sector, where water from Maxwell Bay enters the Cove.  
100 Freshwater input varies both seasonally and inter-annually and carries important amounts of  
101 suspended sediments. Two main creeks discharge into the Cove, the Matias and the Potter  
102 creeks. They exhibit different regimes, the first being snowy and lacustrine, the latter snowy and  
103 glacial (Varela 1998). Drainage ranged between 0.03 and 0.11 m<sup>3</sup> s<sup>-1</sup> in the Matias Creek and  
104 from 0.08 to 3.8 m<sup>3</sup> s<sup>-1</sup> in Potter Creek (Varela 1998). Suspended sediment discharges ranged  
105 between 0.04 and 15 kg m<sup>-3</sup> (average = 0.14 kg m<sup>3</sup>), which correlate with air temperature. These  
106 characteristics are consistent with data from other glaciomarine environments in Antarctic  
107 coastal waters (Leventer and Dunbar 1985).

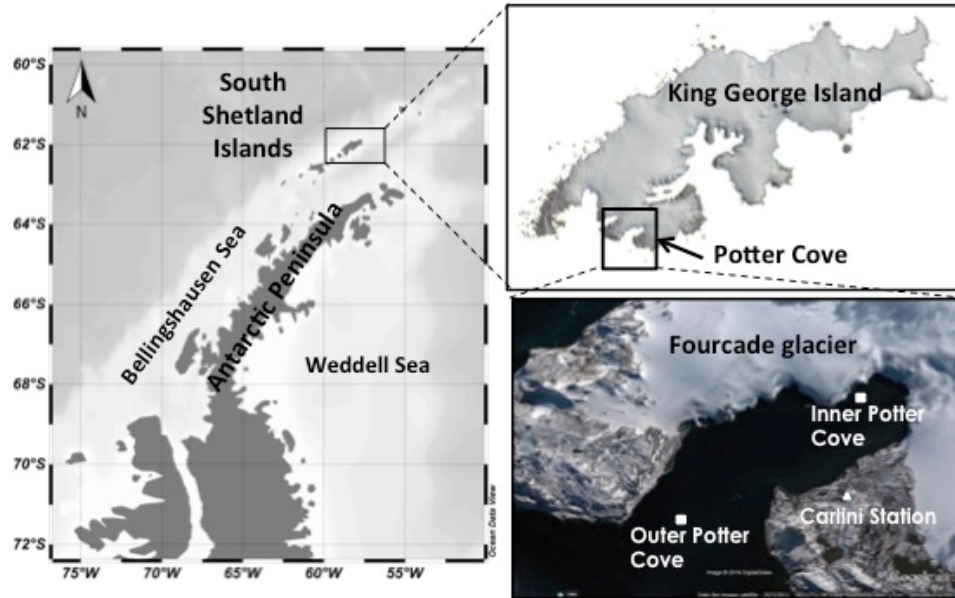

108 Fig. 1. Map of Potter Cove and its location on Isla 25 de Mayo/King George Island.

## 109 2.1. Food web assembly

110 We constructed the FW of Potter Cove ecosystem primarily based on information about species  
111 living in that system and their feeding habits from studies within the framework of an  
112 international research cooperation between Argentina and Germany initiated in 1994 and  
113 ongoing for more than 20 years (Wiencke et al. 1998, 2008).

114 We collected information on feeding links by a thorough literature search (> 500 papers and  
115 reports revised). To assemble the network we only considered trophic interactions confirmed by  
116 gut content studies and/or field observation. Furthermore, direct observations of researchers from  
117 field sampling campaigns in the Cove (e.g. divers when collecting benthic samples) were also  
118 taken into account. Laboratory experimental studies, where feeding selectivity, palatability or  
119 behavior was tested, were not included in this study as we consider the trophic links proved from  
120 experiments are not as robust as the ones gathered from the field data. Investigations using  
121 biomarkers (i.e. stable isotopes and fatty acids) were not considered since trophic interactions are

122 established by sampling few individuals ( $n \approx 10-100$ ) and studied prey-predator relationships are  
123 usually between trophic species widely aggregated. Further details on the trophic links included  
124 in the present study (references and methods used to confirm a link) are presented in the  
125 electronic supplementary material (Appendix A).

126 Trophospecies, here defined as aggregated groups of taxa, were only considered when data on  
127 specific biological species were not available (lack of data resolution) or when taxa shared the  
128 same set of predators and prey within the FW (trophic similarity criteria). We have not  
129 considered top vertebrate predators (e.g. penguins, seals, whales), as they only sporadically enter  
130 the Cove to feed. In addition, pelagic fish (typically taken by Antarctic penguins and pinnipeds)  
131 were not considered due to paucity of occurrence (Barrera-Oro and Casaux 2008).

132 The diversity of the expertise of the authors contributing to the present study was a key factor in  
133 generating the quality of the FW, and inherently improved the network representation of the  
134 Potter Cove ecosystem.

## 135 2.2. Network analysis

136 An interaction matrix of pairwise interactions was constructed; a value of 1 or 0 was assigned to  
137 each element  $a_{ij}$  of the matrix depending on whether the  $j$ -species preyed or not on the  $i$ -species.

138 The FW is an oriented graph with  $L$  trophic links between  $S$  nodes or species. The FW graph was  
139 drawn from the interaction matrix using Visone software version 2.9.2 (Brandes and Wagner  
140 2004).

141 Several network properties that are commonly used to describe complexity and structure in FWs  
142 were calculated (Dunne et al. 2002b, de Santana et al. 2013): (1) number of species,  $S$ ; (2) total  
143 number of interactions or trophic links,  $L$ ; (3) number of interactions per species or linkage

144 density,  $L/S$ ; (4) connectance or trophic links divided by total number of possible interactions,  
145  $C=L/S^2$ ; percentage of (5) top species (species with prey but without predators), (6) intermediate  
146 species (species with prey and predators), (7) basal species (species with predators/consumers  
147 but without prey); and (8) percentage of omnivores (species eating prey from more than one  
148 trophic level).  
149 Trophic levels ( $TL$ ) of species were calculated using the short-weighted  $TL$  formula of Williams  
150 and Martinez (2004). Short-weighted trophic level is defined as the average of the shortest  $TL$   
151 and prey-averaged  $TL$ . Shortest  $TL$  of a consumer in a food web is equal to 1 + the shortest chain  
152 length from this consumer to any basal species (Williams and Martinez 2004). Prey averaged  $TL$   
153 is equal to 1 + the mean  $TL$  of all consumer's trophic resources, calculated as

$$TL_j = 1 + \sum_{i=1}^S l_{ij} \frac{TL_i}{n_j}$$

154 where  $TL_j$  is the trophic level of species  $j$ ;  $S$  is the total number of species in the food web;  $l_{ij}$  is  
155 the connection matrix with  $S$  rows and  $S$  columns, in which for column  $j$  and row  $i$ ,  $l_{ij}$  is 1 if  
156 species  $j$  consumes species  $i$  and 0 if not; and  $n_j$  is the number of prey species in the diet of  
157 species  $j$ . Therefore, Short-weighted  $TL$  yields a minimum estimate of  $TL$  and assumes a value of  
158 1.0 for basal species (Williams and Martinez 2004). We considered the mean  $TL$  of the web as  
159 the average of all species'  $TL$ .  
160 Two secondary graphs, the competition graph and the common-enemy graph, were constructed.  
161 The first one, also known as predator overlap graph, connects predators that share one or more  
162 prey, while the latter is drawn by connecting prey species sharing one or more predators (Pimm  
163 et al. 1991). Predator overlap graph results were discussed considering dietary data on each  
164 predator species involved. To examine a plausible organization in predator and prey species, we  
165 separately studied the degree distribution of links  $P(k)$  for each overlap graph. Links in predator



166 distribution represent the number of prey, while in prey distribution it depicts number of  
167 predators. Graphs were plotted using Visone software (version 2.9.2).

168 We also studied the topology of the FW by measuring three more properties: (9) characteristic  
169 path length (ChPath), or the average shortest path length between all pairs of species, (10)  
170 clustering coefficient (CC), or the average fraction of pairs of species connected to the same  
171 species that are also connected to each other, and (11) degree distribution, or the fraction of  
172 trophic species  $P(k)$  that have  $k$  or more trophic links (both predator and prey links) (Albert and  
173 Barabási 2002). Trophic links were treated as undirected when calculating path length and  
174 clustering because effects can propagate through the web in either direction, through changes to  
175 both predator and prey species (Watts and Strogatz 1998).

176 Results of these properties and the ones aforementioned for Potter Cove FW were compared  
177 among other marine webs that were chosen considering different criteria: size ( $S > 25$ ), temporal  
178 era (fourth era, see Link et al. 2005) and quality data (i.e. FWs built upon stable isotopes were  
179 excluded).

180 Degree distributions of the total FW and of the mentioned overlap graphs were examined and  
181 fitted using nonlinear regression analysis (Xiao et al. 2011). Model selection was performed by  
182 computing the Akaike Information Criterion corrected for small sample size (AICc) (Burnham  
183 and Anderson 2002, Xiao et al. 2010). R package *nls* (Nonlinear Least Squares) was used to  
184 make power-law and exponential fitting (R Core Team 2016).

### 185 3. Results

186 The Potter Cove FW (Fig. 2) includes 91 species, composed of 71 biological species, 17  
187 trophospecies (i.e., merging two or more taxonomic species by trophic similarity) and 3 non-  
188 living nodes (i.e. fresh detritus, aged detritus and necromass).

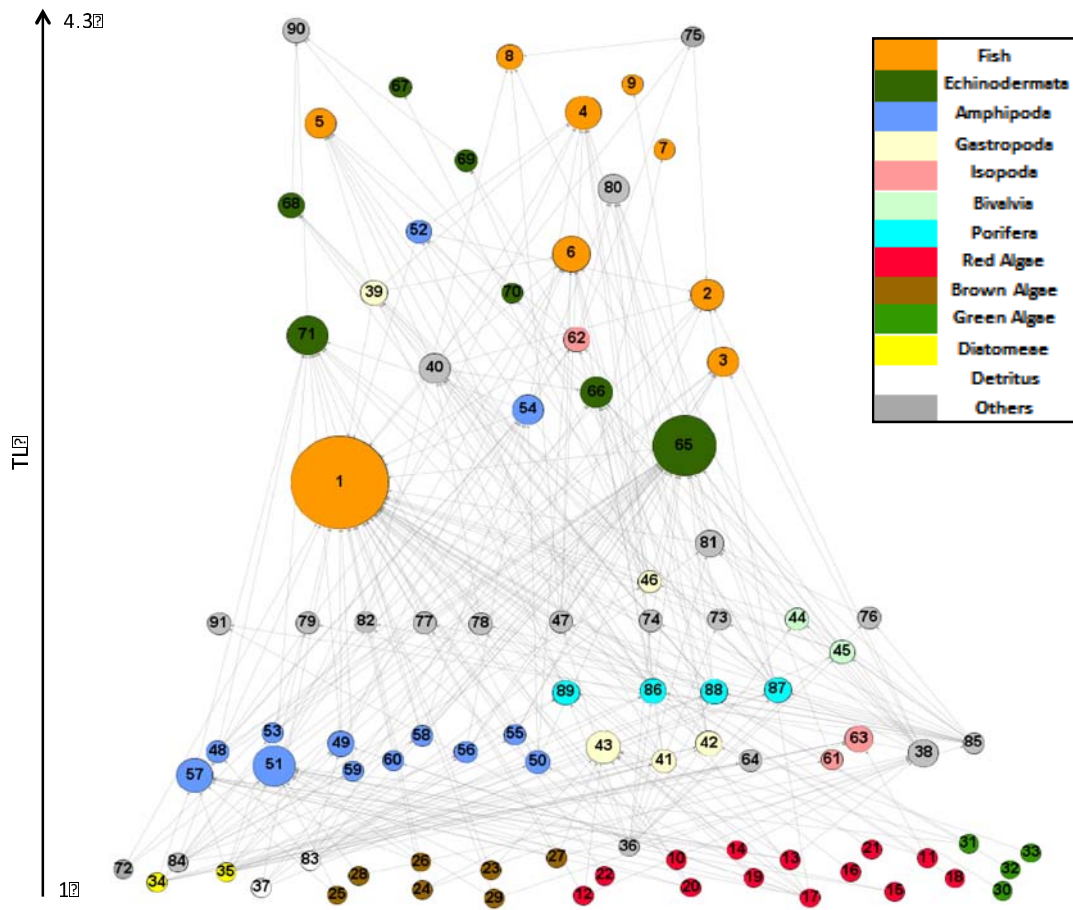

189 Fig. 2. Graphic representation of Potter Cove FW with the trophic level (TL) on the vertical scale  
190 and node width proportional to the total degree (in- and out-). Node colors are by functional  
191 group. Network was plotted with Visone (version 2.9.2). See electronic supplementary material  
192 (Appendix B) for exhaustive lists of trophic species, their trophic level, degree (in- and out-  
193 links), functional and taxonomic group affiliation (e.g. algae, phytoplankton, zooplankton, fish,  
194 amphipods).

195 Algae (24 species) comprise red (13 spp.), brown (7 spp.) and green algae (4 spp.). The next  
196 trophic levels consist of 13 amphipod species, 3 isopod species, 4 sponge species (one

197 aggregated node: *Stylocordyla borealis* and *Mycale acerata*), 5 gastropod species, 2 bivalve  
198 species, 7 echinoderm species, and 9 demersal fish species. See electronic supplementary  
199 material (Appendix B) for exhaustive lists of taxa, their trophic level, degree (in- and out-links),  
200 functional and taxonomic group affiliation (e.g. algae, phytoplankton, zooplankton, fish,  
201 amphipods).

202 The first thing to note about Potter Cove FW is that most of the species (47%) were at  
203 intermediate levels, implying that they act as predators and prey depending on the trophic  
204 interaction they are involved in. Moreover, as shown in Fig. 2 some species are far more  
205 connected (9 species with degree > 15) than others, according to the total number of trophic  
206 interactions they have (e.g. fish and echinoderms).

207 The main properties of the network complexity for Potter Cove FW included 307 total  
208 interactions and a linkage density of 3.4. As a consequence, a connectance of 0.04 was reported  
209 (Table 1).

210 Table 1. Properties of network complexity and structure for Potter Cove FW. S = number of  
211 trophic species, L/S = linkage density, C = connectance ( $L/S^2$ ), T = % top species, I = %  
212 intermediate species, B = % basal species, Omn = percentage of omnivorous, TL = mean trophic  
213 level, ChPath = characteristic path length, CC = clustering coefficient.

| <b>Food web</b> | <b>S</b> | <b>L/S</b> | <b>C</b> | <b>T</b> | <b>I</b> | <b>B</b> | <b>Omn</b> | <b>TL</b> | <b>ChPath</b> | <b>CC</b> |
|-----------------|----------|------------|----------|----------|----------|----------|------------|-----------|---------------|-----------|
| Potter Cove     | 91       | 3.4        | 0.04     | 19       | 47       | 34       | 45         | 2.1       | 1.8           | 0.08      |

214 Although intermediate species outnumbered top and basal species, comprising more than half of  
215 the species in the FW, the basal species were also numerous (Table 1). In addition, almost half of  
216 the species were omnivorous (45%), similar to the percentage observed in intermediate species.  
217 The mean trophic level (TL) for Potter Cove FW was 2.1, which was supported by the relatively  
218 high proportion of basal species that tend to lower the average.

219 Network topological properties, characteristic path length (ChPath) and clustering coefficient  
220 (CC) were 1.8 and 0.08, respectively.

221 The degree distribution for the Potter Cove FW (Fig. 3) showed that the exponential model best  
222 fitted the data, according to nonlinear regression and AICc analyses (Table 2). The three species  
223 with the highest degree were: *Notothenia coriiceps* (fish, 48 links), *Ophionotus victoriae*  
224 (echinoderm, 33 links) and *Gondogeneia antarctica* (amphipod, 20 links).

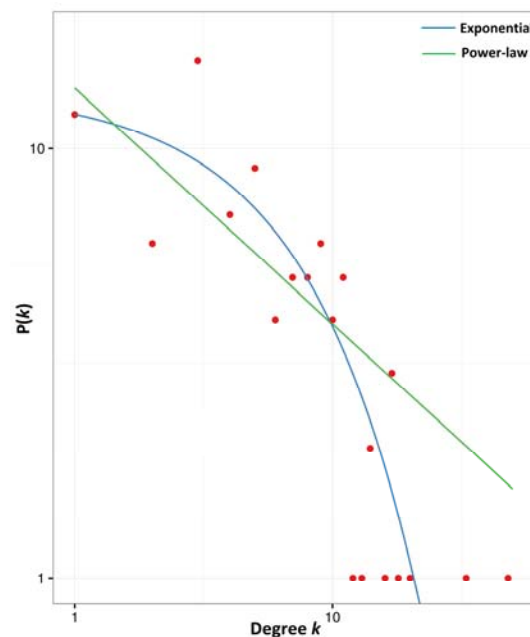

225 Fig. 3. Log-log degree distribution of links  $P(k)$  for Potter Cove FW. Two candidate models are  
226 shown. Best fit is the exponential model.

227 The competition graph derived from Potter Cove FW is highly connected. It includes 60 species  
228 and 478 indirect interactions (Fig. 4) and shows that several pairs of predators share many prey.

229 For instance, all trophic species of sponges form a more connected group than with the rest of the  
230 prey species. Furthermore, some species of echinoderms, amphipods and demersal fish are  
231 intensively competing for common food sources (see link width and color, Fig. 4).

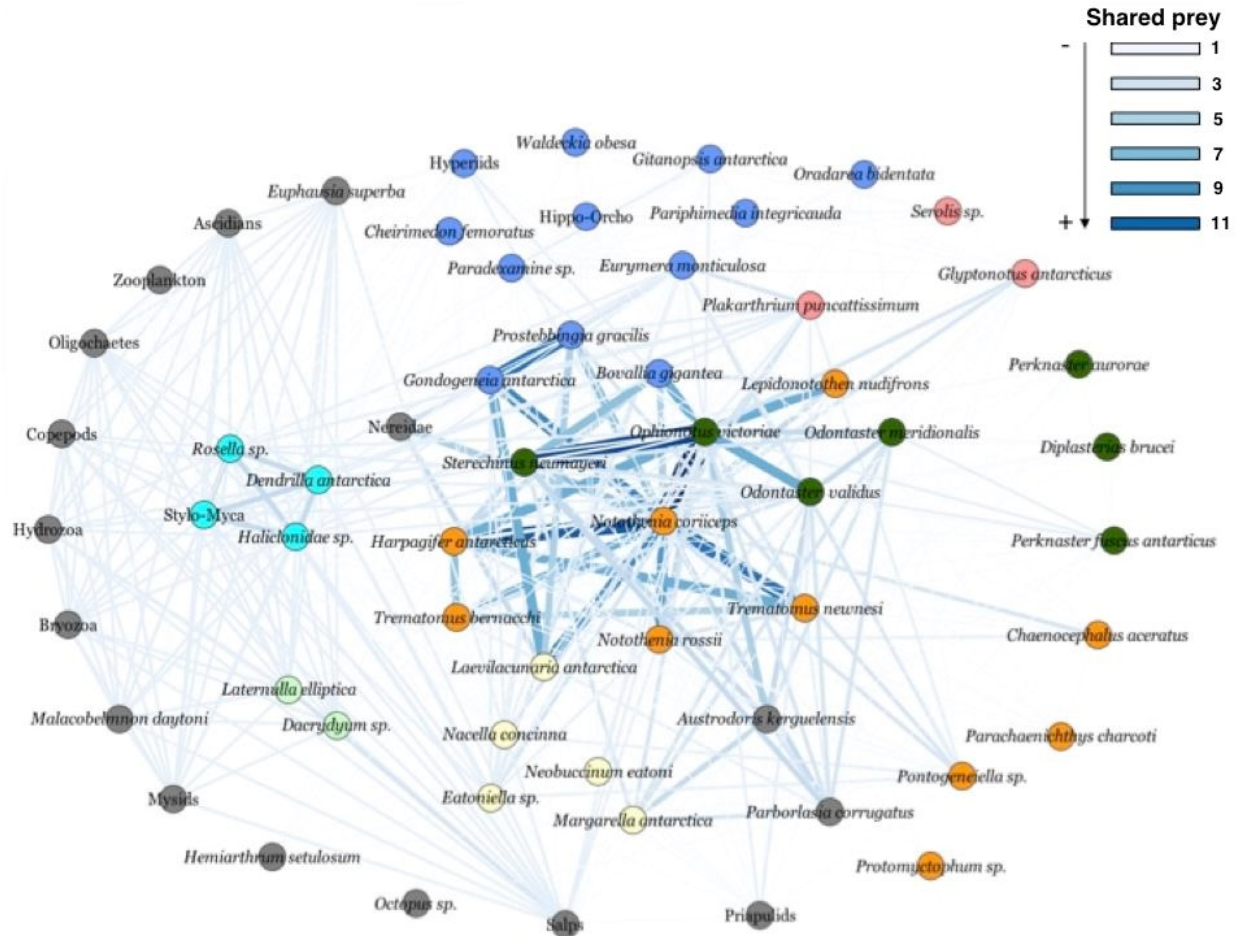

232 Fig. 4. Competition graph for the Potter Cove FW. Node colors (as in Fig. 2): functional groups.  
233 Link width and colors: number of shared prey.

234 To study these potential species interactions, specific competition graphs for the latter two  
235 functional groups were built (Fig. 5). The fish overlap graph includes 9 biological species and 28  
236 competitive interactions. It is worthy to note that two species, *Notothenia coriiceps* and  
237 *Harpagifer antarcticus*, presented highly overlapping diets. Moreover, *N. coriiceps* shares many  
238 of the same prey species, which may or may not involve any competition (Fig. 5 a). On the other  
239 hand, the amphipod overlap graph suggested low resource overlap among species. However,  
240 *Gondogeneia antarctica* and *Prostebbingia gracilis* have many prey in common (Fig. 5 b).

(a)

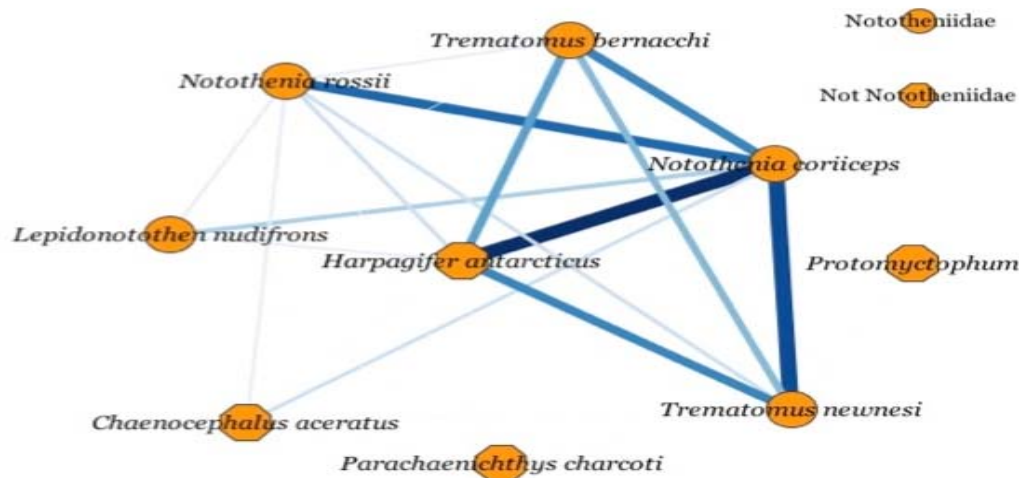

(b)

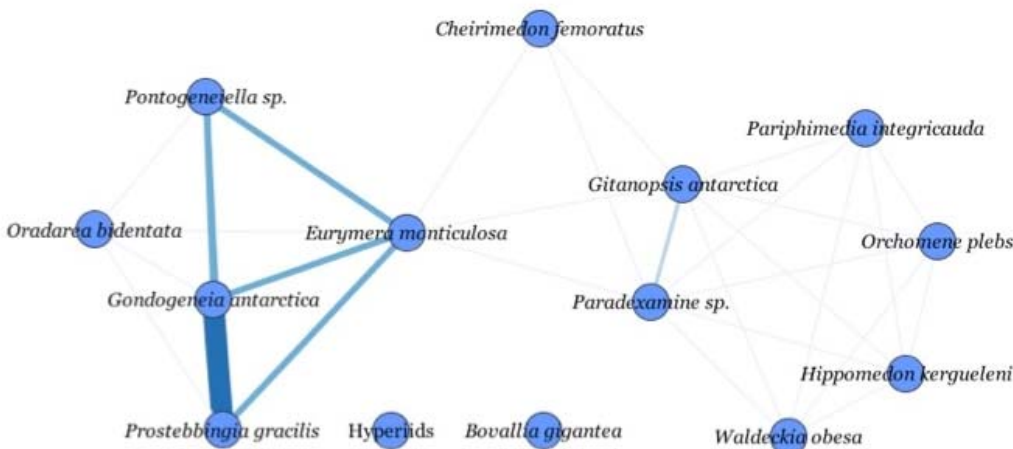

241 Fig. 5. Competition graphs for (a) demersal fish and (b) amphipod functional groups. Link width  
 242 and colors: number of shared prey (see Fig. 4).

243 The common-enemy graph shows a hyperconnected structure, where the majority of the species  
 244 are connected. It contained 74 prey species and 1497 indirect interactions (Fig. 6, up-left). Most  
 245 of the species are connected due to having only one predator in common. In order to elucidate  
 246 groups of species having stronger indirect interactions, we eliminated links with value 1. This  
 247 new graph (Fig. 6, large network) showed groups of species connected by strong interactions:

248 sponges (except for *Dendrilla antarctica*), benthic diatoms – fresh detritus, benthic diatoms –  
249 epiphytic diatoms, zooplankton – phytoplankton, some species of amphipods (i.e. *Gondogeneia*  
250 *antarctica* – *Paradexamine* sp. – *Prostebbingia* sp. – *Eurymera meticulosa*), and several red and  
251 brown algae (*Gigartina skottsbergii* – *Desmarestia menziesii* – *Iridaea cordata*) (Fig. 6).

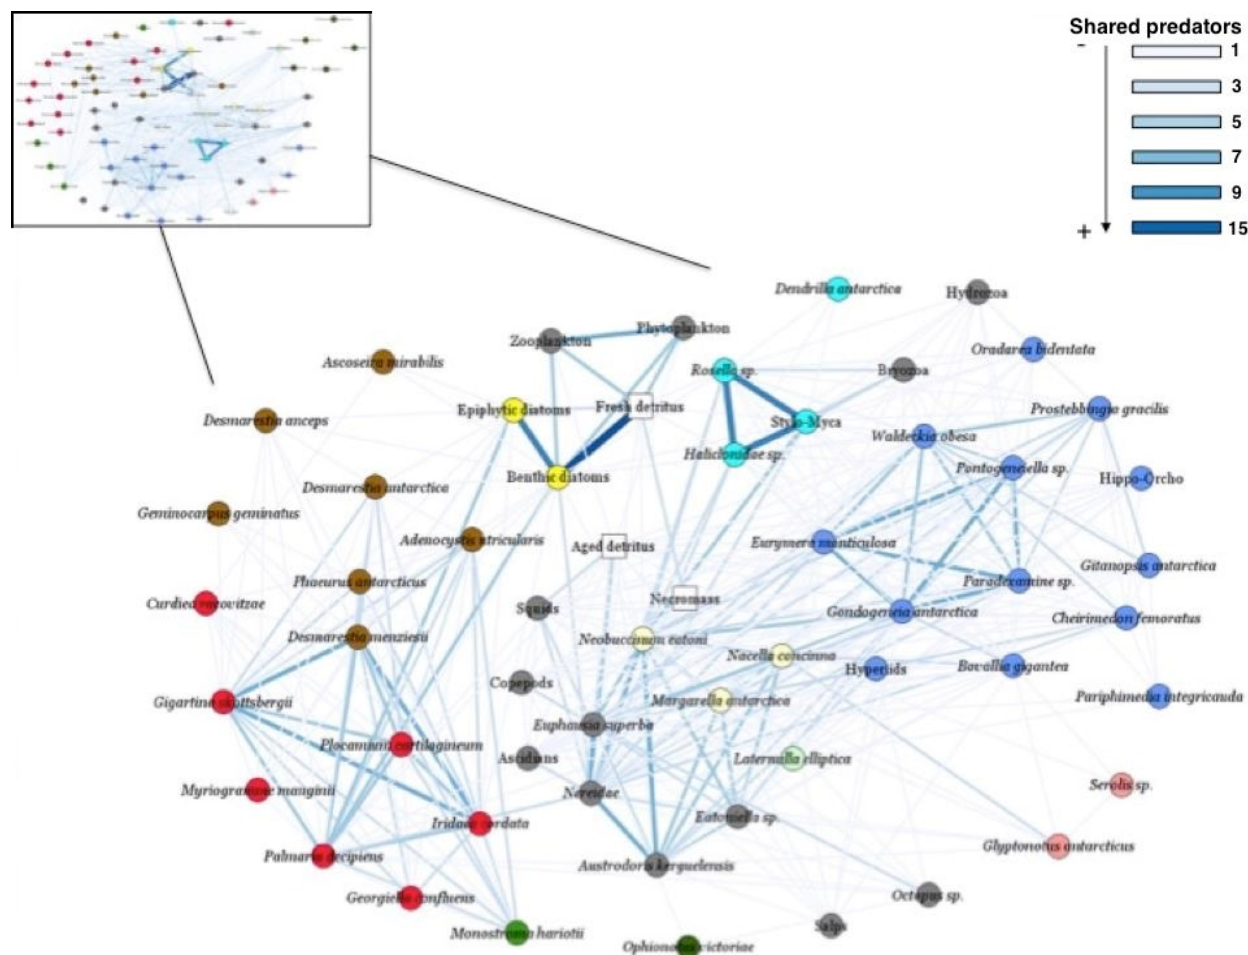

252 Fig. 6. Common-enemy graph for Potter Cove FW. Original graph in left upper corner. Large  
253 network shows prey species that share more than one predator. Node colors (as in Fig. 2):  
254 functional groups. Link width and colors: number of shared predators.

255 Degree distribution of links in the competition and common-enemy graphs (Fig. 7) fit best to an  
256 exponential model (Table 2).

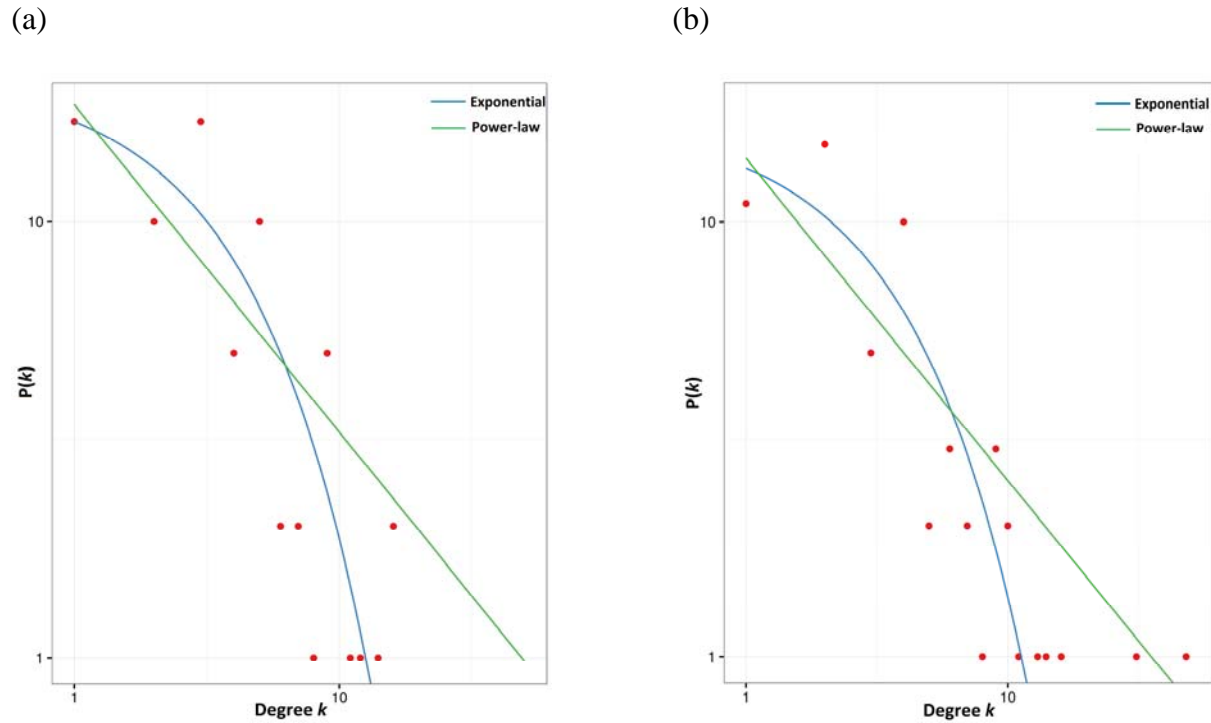

257 Fig. 7. Log-log degree distribution of links  $P(k)$  for (a) the competition and (b) common-enemy  
258 graphs. Best fit is the exponential model for both distributions.  
259

260 Comparison between the Potter Cove FW and other marine webs showed that linkage density  
261 ( $L/S$ ) and connectance ( $C$ ) were lower in the Potter Cove web. The proportions of top and basal  
262 species were relatively high, whereas the percentage of omnivory was the second lowest among  
263 all webs that were compared. While the characteristic path length in Potter Cove FW was similar  
264 to the rest of the FWs, the clustering coefficient was one order of magnitude lower (Table 3).



265 Table 2. Model fit of exponential and power-law models for degree distributions of total FW (in-  
 266 and out-links), competition (only predators) and common-enemy (only prey) overlap graphs.  
 267 AICc and AIC<sub>Δ</sub> are the Akaike corrected for small sample size and delta values for each  
 268 candidate model. \* Indicates best-fit model.

|                    | <b>Model</b>  | <b>AICc</b> | <b>AIC<sub>Δ</sub></b> |
|--------------------|---------------|-------------|------------------------|
| Total FW           | Exponential * | 94.90       | 0.000                  |
|                    | Power-law     | 101.70      | 6.756                  |
| Competition graph  | Exponential * | 72.56       | 0.000                  |
|                    | Power-law     | 76.31       | 3.751                  |
| Common-enemy graph | Exponential * | 76.16       | 0.000                  |
|                    | Power-law     | 82.00       | 5.839                  |

269 Table 3. Comparison of network properties between Potter Cove and other marine FWs. S =  
 270 number of trophic species, L/S = linkage density, C = connectance (L/S<sup>2</sup>), T = % top species, I =  
 271 % intermediate species, B = % basal species, Omn = percentage of omnivorous, TL = mean  
 272 trophic level, ChPath = characteristic path length, CC = clustering coefficient. NA: not available  
 273 data.

| <b>Food web</b>              | <i>S</i> | <i>L/S</i> | <i>C</i> | <i>T</i> | <i>I</i> | <i>B</i> | <i>Omn</i> | <i>TL</i> | <i>ChPath</i> | <i>CC</i> | <i>Source</i>               |
|------------------------------|----------|------------|----------|----------|----------|----------|------------|-----------|---------------|-----------|-----------------------------|
| <i>Marine non-polar webs</i> |          |            |          |          |          |          |            |           |               |           |                             |
| Car. reef (s)                | 50       | 11.1       | 0.22     | 0        | 94       | 6        | 86         | 2.9       | 1.6           | 0.36      | Opitz (1996)                |
| Benguela                     | 29       | 7.0        | 0.24     | 0        | 93       | 7        | 76         | 3.2       | 1.6           | 0.30      | Yodzis<br>(1998)            |
| NE US Shelf                  | 79       | 17.8       | 0.22     | 4        | 94       | 3        | 62         | 3.1       | 1.6           | 0.31      | Link (2002)                 |
| Carib. (l)                   | 249      | 13.3       | 0.05     | NA       | NA       | NA       | NA         | NA        | 1.9           | 0.16      | Rezende et<br>al. (2009)    |
| Lough Hyne                   | 350      | 14.7       | 0.04     | NA       | NA       | NA       | NA         | NA        | NA            | NA        | Riede et al.<br>2010        |
| <i>Marine polar webs</i>     |          |            |          |          |          |          |            |           |               |           |                             |
| Arctic I                     | 140      | 6.8        | 0.05     | 40       | 56       | 14       | 80.7       | 2.3       | NA            | NA        | Bodini et al.<br>(2009)     |
| Arctic II                    | 159      | 8.6        | 0.05     | NA       | NA       | NA       | 52         | 2.7       | 2.3           | 0.25      | Kortsch et al.<br>2015      |
| Antarctic                    | 586      | 6.8        | 0.01     | 23       | 21       | 56       | 41.1       | 2.2       | 3.0           | 0.14      | de Santana et<br>al. (2013) |
| Weddell Sea                  | 491      | 33.2       | 0.07     | 6.5      | 80       | 13.5     | 67         | 2.5       | NA            | NA        | Jacob (2005)                |
| Potter Cove                  | 91       | 3.4        | 0.04     | 19       | 47       | 34       | 45         | 2.1       | 1.8           | 0.08      | This study                  |

## 274 **4. Discussion**

### 275 4.1. Food web complexity and structure

276 Potter Cove FW properties of complexity and structure showed several singularities that make  
277 the web unique in terms of species-richness, link configuration and topological characteristics.  
278 Network complexity was mainly assessed by linkage density (L/S) and connectance (C). Both of  
279 these properties were found to be relatively low in the Potter Cove web:  $L/S=3.4$  and  $C=0.04$ .  
280 Nevertheless, direct comparisons of linkage density and connectance values suggest that marine  
281 FWs tend to resemble each other, and that they are fundamentally different from other kinds of  
282 FWs, based on their high values (Dunne et al. 2004). Opposite to this hypothesis of marine FW  
283 similarity, de Santana et al. (2013) found that connectance in the Arctic marine FW was 5 times  
284 larger than that of the Antarctic one (0.05 versus 0.01). Furthermore, within marine webs, polar  
285 networks tend to display low values of linkage density (de Santana et al. 2013). In this sense,  
286 complexity exhibited in the Potter Cove FW resembles closely to what is known so for FWs in  
287 Polar regions.

288 Could low values of linkage density and connectance in Potter Cove network be a consequence  
289 of methodological issues? Dunne et al. (2002b) suggested that both low- and high-connectance  
290 FWs are unusual, and that extreme connectances may sometimes be artifacts of assembly  
291 procedures. They exemplified this statement by showing that the lowest connectance webs they  
292 studied ( $C \approx 0.03$ , Grassland and Scotch Broom), which is similar to Potter Cove FW  
293 connectance value, are “source-webs”. These are constructed by linking food chains upward  
294 starting from one or a few basal species. The Potter Cove FW is a species-rich ecological  
295 network and not a source-web since it was not constructed upward from one or two basal species  
296 but it is characterized by  $> 30\%$  basal species. Thus there is no evidence we know of which

297 suggests that our low values of linkage density and connectance were a consequence of the  
298 assembly procedure of the network. In turn this implies that the assembly-connectance  
299 relationship in FWs is not as strong as previously thought (Dunne et al. 2002b).

300 Whether ecological networks display low or high L/S and C values is crucial to gain insight in  
301 the ecosystem's synthetic properties like robustness. Empirical analyses of FWs support the  
302 notion that the robustness of a FW increases with its linkage density and connectance (De  
303 Angelis 1975, Dunne et al. 2002a, Montoya and Solé 2003). Low values of L/S and C found in  
304 Potter Cove FW, combined with ongoing climate change effects on benthic communities in the  
305 area (Pasotti et al. 2015b, Sahade et al. 2015), suggest potential ecosystem fragility which need  
306 to be addressed.

307 Furthermore, direct comparison of common FW properties, like percentages of top, intermediate  
308 and basal species, indicates that the Potter Cove network has strong structural differences and  
309 shows unique features compared to other marine ecosystems. Important dissimilarities were  
310 found in top and basal species values as Potter Cove FW shows a higher number of these trophic  
311 species. After comparing 19 FW properties, Dunne et al. (2004) concluded that the excessively  
312 low percentage of basal taxa in marine FWs compared to other systems is clearly an artifact of  
313 poor resolution of primary producers and consumer links to them. One of the methodological  
314 strengths of Potter Cove FW is the high taxonomic resolution of the basal nodes. A good  
315 taxonomic resolution of the lower trophic levels, such as the macroalgal community, is essential  
316 to understand Potter Cove ecosystem functioning, since there seems to be a species-specific  
317 selective consumption (Barrera-Oro and Casaux 1990, Iken et al. 1997, Iken et al. 1998).

318 Furthermore, algal species show a marked pattern of depth distribution and tridimensional  
319 structure (Quartino et al. 2005, Huang et al. 2007). Macroalgae are one of the main primary

320 producers in Potter Cove, and probably support a large fraction of secondary production of the  
321 benthos community (Quartino et al. 2008). Implications in ecosystem functioning and stability  
322 are only possible to elucidate in FWs where species involved in energy and matter transfer  
323 processes are well represented.

324 Proportions of intermediate species (*I*) and omnivory (*Omn*) in Potter Cove FW are relatively  
325 low when compared to other marine webs, but close to values for Antarctic FW as reported by de  
326 Santana et al. (2013). Levels of *I* and omnivory are usually correlated in FW studies, as the  
327 majority of species acting as predators and prey also feed on more than one trophic level  
328 (omnivorous). The importance of omnivory for the structure and dynamics of FWs is a long-  
329 standing controversy in ecology (Burns 1989, Polis 1991), and whether omnivory stabilizes or  
330 destabilizes webs is not clear (Vandermeer 2006, Namba et al. 2008, Johnson et al. 2014). In  
331 Antarctica a recent study suggests that omnivory is a beneficial trait as it allows for more  
332 responsive and flexible utilization of food sources that may be temporally and spatially  
333 constrained and unpredictable (Norkko et al. 2007). The omnivory reported here for Potter Cove  
334 FW is the second lowest percentage among marine webs included in the present study, would  
335 suggest a low stability for Potter Cove FW. Additionally, this result generates testable  
336 hypotheses about the probable stabilizing role of omnivory in large communities, since it was  
337 proven that the risk of secondary extinctions after primary loss of species depends on the trophic  
338 position of the extinct species (Borrvall et al. 2000) and the diversity of that trophic level  
339 (insurance hypothesis, Yachi and Loreau 1999).

340 The mean trophic level for this FW (2.1) is also relatively low, which is the result of several  
341 singularities of the Potter Cove ecological network. Firstly, as already mentioned, the number of  
342 basal trophic species is high, exceeding 30% of number of species (diversity). What's more, the

343 maximum trophic level was 4.27, lower than most other FWs studied (Dunne et al. 2002b, 2004),  
344 which implies that top and basal species are separated by few intermediate taxa. It is worthy to  
345 clarify here that Antarctic top predators, e.g. marine mammals, might increase maximum trophic  
346 level of the web but were not included as they are rarely reported in the Cove. Therefore, the  
347 transfers of energy or nutrients from the base to the top of Potter Cove FW is small, so that the  
348 number of times chemical energy is transformed from a consumer's diet into a consumer's  
349 biomass along the FW is also small. Another reason why the mean trophic level is low is the fact  
350 that most predators at intermediate levels (e.g. amphipods, isopods, bivalves, *N. coriiceps*) feed  
351 predominantly on algae species and/or detritus, being mainly the product of dead and  
352 decomposed macroalgae in Potter Cove (Iken et al. 1998, Huang et al. 2006, Quartino et al.  
353 2008). The macroalgal detritus decomposes and is eaten by detritivores and suspensivores (e.g.  
354 sponges, ascidians, bryozoans, cnidarians), supporting an important amount of the secondary  
355 production (Tatián et al. 2004). The obtained low mean trophic level for Potter Cove FW clearly  
356 shows what species-specific and/or community studies have suggested. These characteristics of  
357 ecological communities have a high impact on ecosystem functioning, such as nutrient and  
358 carbon cycling, and trophic cascades (Post 2002).

359 Short characteristic path length for Potter Cove FW ( $\approx$  two degrees of separation) is similar to  
360 lengths found in other marine FWs. The length between pairs of species within marine webs is  
361 low ( $\approx$ 1.6 links) compared to other types of FWs, with values ranging from 1.3 to 3.7 (Dunne et  
362 al. 2002b). This suggests that most species in Potter Cove FW are potentially very close  
363 neighbours, and that negative effects could spread rapidly and widely throughout the web  
364 (Dunne et al. 2002a).

365 Additionally, the clustering coefficient in this web (0.08) was an order of magnitude lower than  
366 those reported for other marine FWs (Link 2002, Dunne et al. 2004). A low coefficient indicates  
367 that most species are similarly connected to each other, i.e. there are no densely sub-groups of  
368 species interacting with one other. Particularly, the clustering coefficient result of Potter Cove  
369 FW might be the consequence of hubs (i.e. species with high degree, > 20 links) connected with  
370 most of the species across the web and not with a specific group of species. The most connected  
371 species, *N. coriiceps* (demersal fish) and *Ophionotus victoriae* (brittle star), have the widest  
372 ecological niches in our study, being generalists and omnivores. By feeding across several  
373 trophic levels and transversely in the FW, these species have a strong effect on clustering.  
374 Specifically, *N. coriiceps probably* represents a keystone species in the benthopelagic coupling  
375 process promoting the transfer of matter and energy between habitats (Barrera-Oro and Casaux  
376 2008). At the same time, these hub species might be essential for understanding the spread of  
377 perturbations (i.e. biodiversity loss) through the entire FW network.

#### 378 4.2. Degree distribution and overlap graphs: implications for ecosystem 379 functioning

380 Webs with low connectance ( $C \approx 0.03$ ), such as Potter Cove FW, are more likely to display  
381 power law degree distributions (Dunnet et al. 2002a, Montoya and Solé 2002), consistent with  
382 the small-world phenomenon. These are webs combining high clustering, like regular lattices and  
383 short path length, like random graphs (Watts and Strogatz 1998). Therefore, the Potter Cove FW,  
384 with a low estimated connectance ( $C = 0.04$ ), should display a power law degree distribution.  
385 However, it fits best to an exponential distribution according to the low clustering coefficient.  
386 The existence of a universal functional form in the degree distribution of FWs is still under

387 debate, though Stouffer et al. (2005) have shown that approximately exponential degree  
388 distributions can be derived from two different models: nested-hierarchy and generalized  
389 cascade.

390 The influence of the degree distribution on the vulnerability of complex networks against  
391 random failures and intentional attacks has become well known since the work of Albert et al.  
392 (2000). Considering this relationship between degree distribution and vulnerability, Potter Cove  
393 FW would be highly fragile to the removal of the most connected species, but not as much as in  
394 power law networks (Albert et al. 2000, Dunne et al. 2002a, Estrada 2007). Furthermore, de  
395 Santana et al. (2013) suggested that less connected communities should be more sensitive to the  
396 loss of basal species than complex communities because the consumers in simple communities  
397 are dependent on only a few species and cannot survive their loss. Nevertheless, we hypothesize  
398 that although Potter Cove FW shows low connectance, it will be robust against basal node  
399 extinctions due to the high percentage of these trophic species.

400 In addition, degree distribution of links in the competition graph showed that most species have  
401 limited diets, feeding exclusively on few prey, whereas few species feed on a large amount of  
402 food-sources, usually being generalists. The graph suggests that several predator species have  
403 high prey overlap and thus the potential to strongly interact and compete for common prey; this  
404 is the case for sponges, demersal fish and amphipods. We focused the analysis on fish and  
405 amphipods as they are known to play an important role on the Antarctic marine ecosystem  
406 (Barrera-Oro and Casaux 1998, Momo et al. 1998, Barrera-Oro 2002, Huang et al. 2006). Fish  
407 data reflects that there is dietary overlap between *N. coriiceps* and *H. antarcticus* on the one hand  
408 and between *Trematomus newnesi* and *N. rossii* on the other hand. Most of the dietary  
409 comparisons for demersal Antarctic fish communities have dealt with food overlap between fish

410 species pairs (Barrera-Oro 2003). Dietary overlap index (“S” index of Linton et al. 1981)  
411 between *N. coriiceps* and *N. rossii* in Potter Cove as estimated by Barrera-Oro (2003) was 55%,  
412 meaning that these species could compete for more than half of their food-sources. The same  
413 study estimated the index for *N. coriiceps* – *T. newnesi*, being 18%, and *N. coriiceps* – *H.*  
414 *antarcticus*, being 19%. Barrera-Oro (2003) concludes that there is no evidence of food  
415 competition among the shallow cold-water fish communities in Potter Cove. Nevertheless, our  
416 results show that *N. coriiceps* and *H. antarcticus* have many prey in common, with a high degree  
417 of overlapping. However, due to the differences in mobility, habitat use and adult size between  
418 these two species (total length: 45 and 13 cm respectively), competition is probably low (Casaux  
419 1998, Barrera-Oro 2003). Although the first one is a generalist and the latter a specialist, both  
420 species can be grouped in the same feeding category given that they are benthos feeders, eating  
421 amphipods (e.g. *Gondogeneia antarctica*, *Paradexamine* sp., *Prostebbingia* sp., *Eurymera*  
422 *monticulosa*), gastropods (e.g. *Margarella antarctica*, *Nacella concinna*, *Eatoniella* sp.,  
423 *Neobuccinum eatoni*), polychaetes (e.g. Nereidae), and krill in summer (*Euphausia superba*).  
424 On the other hand, the competition graph for amphipods exhibited low dietary overlap among  
425 species. It is worth mentioning that hyperiids and *Bovallia gigantea* are not connected, which  
426 indicates that they do not share food sources with any other amphipods, nor between themselves.  
427 Hyperiids and *B. gigantea* are both carnivores, though the latter mainly feeds on other species of  
428 amphipods, such as *E. monticulosa*, *Prostebbingia* sp. and *G. antarctica* (Richard 1977). On the  
429 contrary, hyperiids principally eat planktonic prey, such as copepods (Pakhomov and  
430 Perissinotto 1996). The most important result of the overlap graph is that species are separated  
431 according to their feeding strategies: herbivores (*P. gracilis*, *G. antarctica*, *O. bidentata* and  
432 *Prostebbingia* sp. – left of the graph), detritivores (*C. femoratus* and *Paradexamine* sp. – middle



433 graph), and scavengers (*W. obesa*, *H. kergueleni*, *O. plebs* and *P. integricauda* – right of the  
434 graph). This demonstrates the importance and utility of the analysis of competition graphs, in  
435 order to better understand alternative energy pathways within apparent trophic guilds; analysis  
436 that would be improved by adding information on each predator species (e.g. body size and  
437 mass, niche specialization).

438 Common-enemy graph derived from Potter Cove FW showed a hyper-connected graph, which  
439 implies that most prey species share at least one predator. The fact that the prey overlap graph of  
440 this FW exhibited high connectivity and exponential distribution has implications for the  
441 functioning of the ecosystem. High-connected prey in Potter Cove FW are: phytoplankton –  
442 zooplankton, benthic diatoms – epiphytic diatoms, and fresh detritus – benthic diatoms. The  
443 latter shows that several sources of food and alternative energy pathways exist in the Potter Cove  
444 ecosystem: phytoplankton (Ahn et al. 1993), benthic microalgal production (Dayton et al. 1986,  
445 Gilbert 1991), and horizontal advection of allochthonous food particles (Dunbar et al. 1989);  
446 important sources of organic matter for marine organisms living in coastal Antarctic ecosystems.

447 In conclusion, comparison of FW properties revealed a particular combination of characteristics  
448 for the Potter Cove ecological network: middle size ( $S \approx 100$ ) compared to other marine FWs,  
449 low linkage density and connectance (with no evidence of being an artifact of resolution or  
450 assembly procedure), low %-omnivory, short path length and low clustering coefficient.

451 According to the overlap graphs and their degree distributions, and the consistency with field  
452 observations and investigations, we suggest these analyses are useful tools to gain insight into  
453 ecosystem functioning. What is more interesting, the common-enemy graph showed the  
454 existence of alternative energy pathways consistent with field investigations in the Cove. As also

455 suggested for East Antarctica FW (Gillies et al. 2012), carbon flow among the benthic fauna in  
456 Potter Cove is complex, with multiple sources of carbon being utilized, which can be asserted  
457 given the good basal resolution of our network.  
458 From a network perspective, Potter Cove FW properties suggest fragility and potential trophic  
459 cascade effects although multiple energy pathways might add robustness to the web. Our results  
460 suggest that species with a high number of links (e.g. *Notothenia corriceps*, *Ophionotus*  
461 *victoriae*, *Gondogeneia antarctica*) could be considered as keystone species for the robustness of  
462 Potter Cove ecosystem.

## 463 **Acknowledgments**

464 This research was supported by Consejo Nacional de Investigaciones Científicas y Técnicas  
465 (CONICET, Argentina), Universidad Nacional de General Sarmiento and Alfred Wegener  
466 Institute for Polar and Marine Research (AWI, Germany). The work was partially funded by PIO  
467 14420140100035CO CONICET Argentina and conducted in the frames of the EU research  
468 network IMCONet funded by the Marie Curie Action IRSES (FP7 IRSES, Action No. 319718).  
469 We thank Dave K.A. Barnes for constructive suggestions on language aspects, which helped us  
470 to improve the manuscript.

## 471 **References**

- 472 1. Ahn, I.Y., Kang, J.S., Kang, J.S., 1993. Primary food sources for shallow-water benthic  
473 fauna in Marian Cove, King George Island during an Austral Summer. Korean Journal of  
474 Polar Research 4, 67–72.

- 475 2. Albert, R. and Barabási, A.L., 2002. Statistical mechanics of complex networks. Reviews  
476 of Modern Physics 74, 47-97.
- 477 3. Albert, R., Jeong, H. and Barabási, A.L., 2000. Error and attack tolerance of complex  
478 networks. Nature 406, 378-382.
- 479 4. Barrera-Oro, E.R., 2002. The role of fish in the Antarctic marine food web: differences  
480 between inshore and offshore waters in the southern Scotia Arc and west Antarctic  
481 Peninsula. Antarctic Science 14, 293-309.
- 482 5. Barrera-Oro, E.R., 2003. Analysis of dietary overlap in Antarctic fish (Notothenioidei)  
483 from the South Shetland Islands: no evidence of food competition. Polar Biology 26,  
484 631-637.
- 485 6. Barrera Oro, E.R. and Casaux, R.J., 1990. Feeding selectivity in *Notothenia neglecta*,  
486 Nybelin, from Potter Cove, South Shetland Islands, Antarctica. Antarctic Science 2, 207-  
487 273.
- 488 7. Barrera-Oro, E.R. and Casaux, R.J., 1998. Ecology of demersal fish species from Potter  
489 Cove. In: Wiencke, C., Ferreyra, G., Arntz, W., Rinaldi, C. (Eds.), The Potter Cove  
490 Coastal Ecosystem, Antarctica. Alfred-Wegener Institut (AWI), Bremerhaven, pp. 156-  
491 167.
- 492 8. Barrera-Oro, E.R. and Casaux, R.J., 2008. General ecology of coastal fish from the South  
493 Shetland Island and west Antarctic Peninsula areas. In: Wiencke, C., Ferreyra, G.A.,  
494 Abele, D., Marensi, S. (Eds.), The Antarctic ecosystem of Potter cove, King-George  
495 Island (Isla 25 de Mayo). Alfred-Wegener Institut (AWI), Bremerhaven, pp. 95-110.
- 496 9. Bascompte, J., 2009. Disentangling the web of life. Science 325, 416-419.

- 497 10. Bodini, A., Bellingeri, M., Allesina, S. and Bondavalli, C., 2009. Using food web  
498 dominator trees to catch secondary extinctions in action. *Philosophical Transactions of*  
499 *the Royal Society of London B: Biological Sciences* 364, 1725-1731.
- 500 11. Borrvall, C., Ebenman, B., Jonsson, T. and Jonsson, T., 2000. Biodiversity lessens the  
501 risk of cascading extinction in model food webs. *Ecology Letters* 3, 131-136.
- 502 12. Brandes, U. and Wagner, D., 2004. Visone - Analysis and visualization of social  
503 networks. In: Jünger, M., Mutzel, P. (Eds.), *Graph Drawing Software*. Springer-Verlag,  
504 Berlin, pp. 321-340.
- 505 13. Brose, U. and Dunne, J.A., 2009. Modelling the dynamics of complex food webs. In:  
506 Verhoef, H.A., Morin, P.J. (Eds.), *Community ecology: Processes, Models, and*  
507 *Applications*. Oxford University Press, Oxford, pp. 37-44.
- 508 14. Burnham, K. P. and Anderson, D.R., 2002. *Model selection and multimodel inference: A*  
509 *practical information-theoretic approach*. Springer-Verlag, New York, 485 pp.
- 510 15. Burns, T.P., 1989. Lindeman's contradiction and the trophic structure of ecosystems.  
511 *Ecology* 70, 1355-1362.
- 512 16. Casaux, R.J., 1998. The contrasting diet of *Harpagifer antarcticus* (Notothenioidei,  
513 *Harpagiferidae*) at two localities of the South Shetland Islands, Antarctica. *Polar Biology*  
514 19, 283-285.
- 515 17. Dayton, P.K., Watson, D., Palmisano, A., Barry, J.P., Oliver, J. S. and Rivera, D., 1986.  
516 *Distribution patterns of benthic microalgal standing stock at McMurdo Sound,*  
517 *Antarctica*. *Polar Biology* 6, 207-213.
- 518 18. De Angelis, D.L., 1975. Stability and connectance in food web models. *Ecology* 56, 238-  
519 243.

- 520 19. de Santana, C.N., Rozenfeld, A.F., Marquet, P.A. and Duarte, C.M., 2013. Topological  
521 properties of polar food webs. *Marine Ecology Progress Series* 474, 15-26.
- 522 20. Deregibus, D., Quartino, M.L., Campana, G.L., Momo, F.R., Wiencke, C. and Zacher,  
523 K., 2016. Photosynthetic light requirements and vertical distribution of macroalgae in  
524 newly ice-free areas in Potter Cove, South Shetland Islands, Antarctica. *Polar Biology* 39,  
525 153-166.
- 526 21. Dunbar, R.B., Leventer, A.R. and Stockton, W.L., 1989. Biogenic sedimentation in  
527 McMurdo Sound, Antarctica. *Marine Geology* 85, 155-179.
- 528 22. Dunne, J.A., Williams, R.J. and Martinez, N.D., 2002a. Network structure and  
529 biodiversity loss in food webs: robustness increases with connectance. *Ecology letters* 5,  
530 558-567.
- 531 23. Dunne, J.A., Williams, R.J. and Martinez, N.D., 2002b. Food-web structure and network  
532 theory: the role of connectance and size. *Proceedings of the National Academy of*  
533 *Sciences* 99, 12917-12922.
- 534 24. Dunne, J.A., Williams, R.J. and Martinez, N.D., 2004. Network structure and robustness  
535 of marine food webs. *Marine Ecology Progress Series* 273, 291-302.
- 536 25. Estrada, E., 2007. Food webs robustness to biodiversity loss: The roles of connectance,  
537 expansibility and degree distribution. *Journal of Theoretical Biology* 244, 296-307.
- 538 26. Gilbert, N.S., 1991. Microphytobenthic seasonality in near-shore marine sediments at  
539 Signy Island, South Orkney Islands, Antarctica. *Estuarine, Coastal and Shelf Science* 33,  
540 89-104.

- 541 27. Gillies, C.L., Stark, J.S., Johnstone, G.J. and Smith, S.D., 2012. Carbon flow and trophic  
542 structure of an Antarctic coastal benthic community as determined by  $\delta^{13}\text{C}$  and  $\delta^{15}\text{N}$ .  
543 Estuarine, Coastal and Shelf Science 97, 44-57.
- 544 28. Huang, Y., Amsler, M., McClintock, J.B., Amsler, C. and Baker, B.J., 2007. Patterns of  
545 gammaridean amphipod abundance and species composition associated with dominant  
546 subtidal macroalgae from the western Antarctic Peninsula. Polar Biology 30, 1417-1430.
- 547 29. Huang, Y., McClintock, J.B., Amsler, C., Peters, K.J. and Baker, B.J., 2006. Feeding  
548 rates of common Antarctic gammarid amphipods on ecologically important sympatric  
549 macroalgae. Journal of Experimental Marine Biology and Ecology 329, 55-65.
- 550 Iken, K., Barrera Oro, E.R., Quartino, M.L., Casaux, R.J. and Brey, T., 1997. Grazing by  
551 the Antarctic fish *Notothenia coriiceps*: evidence for selective feeding on macroalgae.  
552 Antarctic Science 9, 386-391.
- 553 30. Iken, K., Quartino, M.L., Barrera Oro, E.R., Palermo, J., Wiencke, C. and Brey, T., 1998.  
554 Trophic relations between macroalgae and herbivores. In: Wiencke, C., Ferreyra, G.,  
555 Arntz, W., Rinaldi, C. (Eds.), The Potter Cove Coastal Ecosystem, Antarctica. Alfred-  
556 Wegener Institut (AWI), Bremerhaven, pp. 258-262.
- 557 31. Jacob, U., 2005. Trophic Dynamics of Antarctic Shelf Ecosystems—Food Webs and  
558 Energy Flow Budgets. Ph.D. Thesis, University of Bremen. Bremen, Germany.
- 559 32. Jacob, U., Brey, T., Fetzer, I., Kaehler, S., Mintenbeck, K., Dunton, K., Beyer, K.,  
560 Struck, U., Parkhomov, E.A. and Arntz, W.E. 2006. Towards the trophic structure of the  
561 Bouvet Island marine ecosystem. Polar Biology 29, 106-113.

- 562 33. Johnson, S., Domínguez-García, V., Donetti, L. and Muñoz, M.A., 2014. Trophic  
563 coherence determines food-web stability. *Proceedings of the National Academy of*  
564 *Sciences* 111, 17923-17928.
- 565 34. Kortsch, S., Primicerio, R., Fossheim, M., Dolgov, A.V. and Aschan, M., 2015. Climate  
566 change alters the structure of arctic marine food webs due to poleward shifts of boreal  
567 generalists. *Proceedings of the Royal Society B* 282, 20151546.
- 568 35. Leventer, A.R. and Dunbar, R.B., 1985. Suspended particulate matter in Antarctic coastal  
569 waters. *Antarctic Journal of United States of America* 20, 100-103.
- 570 36. Link, J.S., 2002. Does food web theory work for marine ecosystems? *Marine Ecology*  
571 *Progress Series* 230, 1-9.
- 572 37. Link, J.S., Stockhausen, W.T. and Methratta, E.T., 2005. Food-web theory in marine  
573 ecosystems. In: Belgrano, A., Scharler, U.M., Dunne, J., Ulanowicz, R.E. (Eds.), *Aquatic*  
574 *food webs: an ecosystem approach*. Oxford University Press, Oxford, pp. 98-114.
- 575 38. Linton, L.R., Davies, R.W. and Wrona, F.J., 1981. Resource utilization indices: an  
576 assessment. *The Journal of Animal Ecology* 50, 283-292.
- 577 39. Momo, F., Bogazzi, E. and Duttweiler, F., 1998. Amphipods of Potter Cove: community  
578 composition, biology and growth. In: Wiencke, C., Ferreyra, G., Arntz, W., Rinaldi, C.  
579 (Eds.), *The Potter Cove Coastal Ecosystem, Antarctica*. Alfred-Wegener Institut (AWI),  
580 Bremerhaven, pp. 144-149.
- 581 40. Montoya, J.M. and Solé, R.V. 2002. Small world patterns in food webs. *Journal of*  
582 *Theoretical Biology* 214, 405-412.
- 583 41. Montoya, J.M. and Solé, R.V., 2003. Topological properties of food webs: from real data  
584 to community assembly models. *Oikos* 102, 614-622.

- 585 42. Namba, T., Tanabe, K. and Maeda, N., 2008. Omnivory and stability of food webs.  
586 Ecological Complexity 5, 73-85.
- 587 43. Norkko, A., Thrush, S.F., Cummings, V.J., Gibbs, M.M., Andrew, N.L., Norkko, J. and  
588 Schwarz, A.M., 2007. Trophic structure of coastal Antarctic food webs associated with  
589 changes in sea ice and food supply. Ecology 88, 2810-2820.
- 590 44. Opitz, S., 1996. Trophic Interactions in Caribbean Coral Reefs. International Center for  
591 Aquatic Resources, Manila, 341 pp.
- 592 45. Pakhomov, E.A. and Perissinotto, R., 1996. Trophodynamics of the hyperiid amphipod  
593 Themisto gaudichaudi in the South Georgia region during late austral summer. Marine  
594 Ecology Progress Series 134, 91-100.
- 595 46. Pasotti, F., Manini, E., Giovannelli, D., Wölfl, A.C., Monien, D., Verleyen, E.,  
596 Braeckman, U., Abele, D. and Vanreusel, A., 2015a. Antarctic shallow water benthos in  
597 an area of recent rapid glacier retreat. Marine Ecology 36, 716-733.
- 598 47. Pasotti, F., Saravia, L.A., De Troch, M., Tarantelli, M. S., Sahade, R. and Vanreusel, A.,  
599 2015b. Benthic Trophic Interactions in an Antarctic Shallow Water Ecosystem Affected  
600 by Recent Glacier Retreat. PloS One 10, e0141742.
- 601 48. Petchey, O.L., Brose, U. and Rall, B.C., 2010. Predicting the effects of temperature on  
602 food web connectance. Philosophical Transactions of the Royal Society of London B:  
603 Biological Sciences 365, 2081-2091.
- 604 49. Pimm, S.L., Lawton, J.H. and Cohen, J.E., 1991. Food web patterns and their  
605 consequences. Nature 350, 669-674.
- 606 50. Polis, G.A., 1991. Complex trophic interactions in deserts: an empirical critique of food-  
607 web theory. The American Naturalist 138, 123-155.



- 608 51. Post, D.M., 2002. The long and short of food-chain length. *Trends in Ecology and*  
609 *Evolution* 17, 269-277.
- 610 52. Quartino, M.L., Zaixso, H. and Boraso de Zaixso, A.B., 2005. Biological and  
611 environmental characterization of marine macroalgal assemblages in Potter Cove, South  
612 Shetland Islands, Antarctica. *Botanica Marina* 48, 187-197.
- 613 53. Quartino, M.L., Boraso de Zaixso, A.B. and Momo, F.R., 2008. Macroalgal production  
614 and the energy cycle of Potter Cove. In: Wiencke, C., Ferreyra, G.A., Abele, D.,  
615 Marensi, S. (Eds.), *The Antarctic ecosystem of Potter cove, King-George Island (Isla 25*  
616 *de Mayo)*. Alfred-Wegener Institut (AWI), Bremerhaven, pp. 68-74.
- 617 54. Quartino, M.L., Deregibus, D., Campana, G.L., Latorre, G.E.J. and Momo, F.R., 2013.  
618 Evidence of macroalgal colonization on newly ice-free areas following glacial retreat in  
619 Potter Cove (South Shetland Islands), Antarctica. *PLoS One* 8, e58223.
- 620 55. R Core Team, 2016. R: A language and environment for statistical computing. R  
621 Foundation for Statistical Computing, Vienna, Austria. ISBN 3-900051-07-0, URL  
622 <http://www.R-project.org>.
- 623 56. Raffaelli, D., 2000. Trends in research on shallow water food webs. *Journal of*  
624 *Experimental Marine Biology and Ecology* 250, 223-232.
- 625 57. Rezende, E.L., Albert, E.M., Fortuna, M.A. and Bascompte, J., 2009. Compartments in a  
626 marine food web associated with phylogeny, body mass, and habitat structure. *Ecology*  
627 *Letters* 12, 779-788.
- 628 58. Richard, M.G., 1977. The ecology (including physiological aspects) of selected Antarctic  
629 marine invertebrates associated with inshore macrophytes. Ph.D. Thesis, Durham  
630 University. Durham, USA.

- 631 59. Riede, J.O., Rall, B.C., Banasek-Richter, C., Navarrete, S.A., Wieters, E.A., Emmerson,  
632 M.C., Jacob, U. and Brose, U., 2010. Scaling of food-web properties with diversity and  
633 complexity across ecosystems. *Advances In Ecological Research* 42, 139-170.
- 634 60. Roese, M. and Drabble, M., 1998. Wind driven circulation in Potter Cove. In: Wiencke,  
635 C., Ferreyra, G., Arntz, W., Rinaldi, C. (Eds.), *The Potter Cove Coastal Ecosystem,*  
636 *Antarctica.* Alfred-Wegener Institut (AWI), Bremerhaven, pp. 40–46.
- 637 61. Sahade, R., Lagger, C., Torre, L., Momo, F.R., Monien, P., Schloss, I., Barnes, D.K.A.,  
638 Servetto, N. Tarantelli, S. Tatián, M., Zamboni, N. and Abele, D., 2015. Climate change  
639 and glacier retreat drive shifts in an Antarctic benthic ecosystem. *Science Advances* 1,  
640 e1500050.
- 641 62. Stouffer, D.B., Camacho, J., Guimera, R., Ng, C.A. and Nunes Amaral, L.A., 2005.  
642 Quantitative patterns in the structure of model and empirical food webs. *Ecology* 86,  
643 1301-1311.
- 644 63. Tatián, M., Sahade, R. and Esnal, G.B., 2004. Diet components in the food of Antarctic  
645 ascidians living at low levels of primary production. *Antarctic Science* 16, 123-128.
- 646 64. Vandermeer, J., 2006. Omnivory and the stability of food webs. *Journal of Theoretical*  
647 *Biology* 238, 497-504.
- 648 65. Varela, L., 1998. Hydrology of Matías and Potter Creeks. In: Wiencke, C., Ferreyra, G.,  
649 Arntz, W., Rinaldi, C. (Eds.), *The Potter Cove Coastal Ecosystem, Antarctica.* Alfred-  
650 *Wegener Institut (AWI), Bremerhaven,* pp. 33– 39.
- 651 66. Walther, G.R., 2010. Community and ecosystem responses to recent climate change.  
652 *Philosophical Transactions of the Royal Society B: Biological Sciences* 365, 2019-2024.

- 653 67. Watts, D.J. and Strogatz, S.H., 1998. Collective dynamics of ‘small-world’ networks.  
654 Nature 393, 440-442.
- 655 68. Wiencke, C., Ferreyra, G., Arntz, W. and Rinaldi, C., 1998. The Potter Cove Coastal  
656 Ecosystem, Antarctica. Alfred-Wegener Institut (AWI), Bremerhaven, 299 pp.
- 657 69. Wiencke, C., Ferreyra, G.A., Abele, D. and Marensi, S., 2008. The Antarctic ecosystem  
658 of Potter cove, King-George Island (Isla 25 de Mayo): Synopsis of research performed  
659 1999-2006 at the Dallmann Laboratory and Jubany Station. Berichte zur Polar-und  
660 Meeresforschung. Alfred-Wegener Institut (AWI), Bremerhaven, 407 pp.
- 661 70. Williams, R.J. and Martinez, N.D., 2004. Limits to trophic levels and omnivory in  
662 complex food webs: theory and data. The American Naturalist 163, 458-468.
- 663 71. Wirta, H.K., Vesterinen, E.J., Hambäck, P.A., Weingartner, E., Rasmussen, C.,  
664 Reneerkens, J., Schmidt, N.M., Gilg, O. and Roslin, T., 2015. Exposing the structure of  
665 an Arctic food web. Ecology and Evolution 5, 3842-3856.
- 666 72. Woodward, G., Benstead, J.P., Beveridge, O.S., Blanchard, J., Brey, T., Brown, L.E.,  
667 Cross, W.F., Friberg, N., Ings, T.C., Jacob, U., Jennings, S., Ledger, M.E., Milner, A.M.,  
668 Montoya, J.M., O’Gorman, E., Olesen, J.M., Petchey, O.L., Pichler, D.E., Reuman, D.C.,  
669 Thompson, M.S.A., van Veen, F.J.F. and Yvon-Durocher, G., 2010. Ecological networks  
670 in a changing climate. Advances in Ecological Research 42, 71-138.
- 671 73. Woodward, G., Thompson, R., Townsend, C.R. and Hildrew, A.G., 2005. Pattern and  
672 process in food webs: evidence from running waters. In: Belgrano, A., Scharler, U.M.,  
673 Dunne, J., Ulanowicz, R.E. (Eds.), Aquatic food webs: an ecosystem approach. Oxford  
674 University Press, Oxford, pp. 51-66.

- 675 74. Xiao, X., White, E.P., Hooten, M.B. and Durham, S.L., 2011. On the use of  
676 log-transformation vs. nonlinear regression for analyzing biological power laws. *Ecology*  
677 92, 1887-1894.
- 678 75. Yachi, S. and Loreau, M., 1999. Biodiversity and ecosystem productivity in a fluctuating  
679 environment: the insurance hypothesis. *Proceedings of the National Academy of Sciences*  
680 96, 1463-1468.
- 681 76. Yodzis, P., 1998. Local trophodynamics and the interaction of marine mammals and  
682 fisheries in the Benguela ecosystem. *Journal of Animal Ecology* 67, 635-658.  
683

684 **Appendices**

685 Supplementary material Appendix A and B are available at DOI [10.6084/m9.figshare.4498715](https://doi.org/10.6084/m9.figshare.4498715).
